# Supplementary material
Source: PubMed Central journal article supplement (PMC8329795)

## Supplemental Online Content

Klein P, Devinsky O, French J, et al. Suicidality risk of newer antiseizure medications: a meta-analysis. *JAMA Neurol*. Published online August 2, 2021. doi:10.1001/jamaneurol.2021.2480

**eFigure.** PRISMA Flow Diagram

This supplemental material has been provided by the authors to give readers additional information about their work.

**eFigure. PRISMA Flow Diagram**

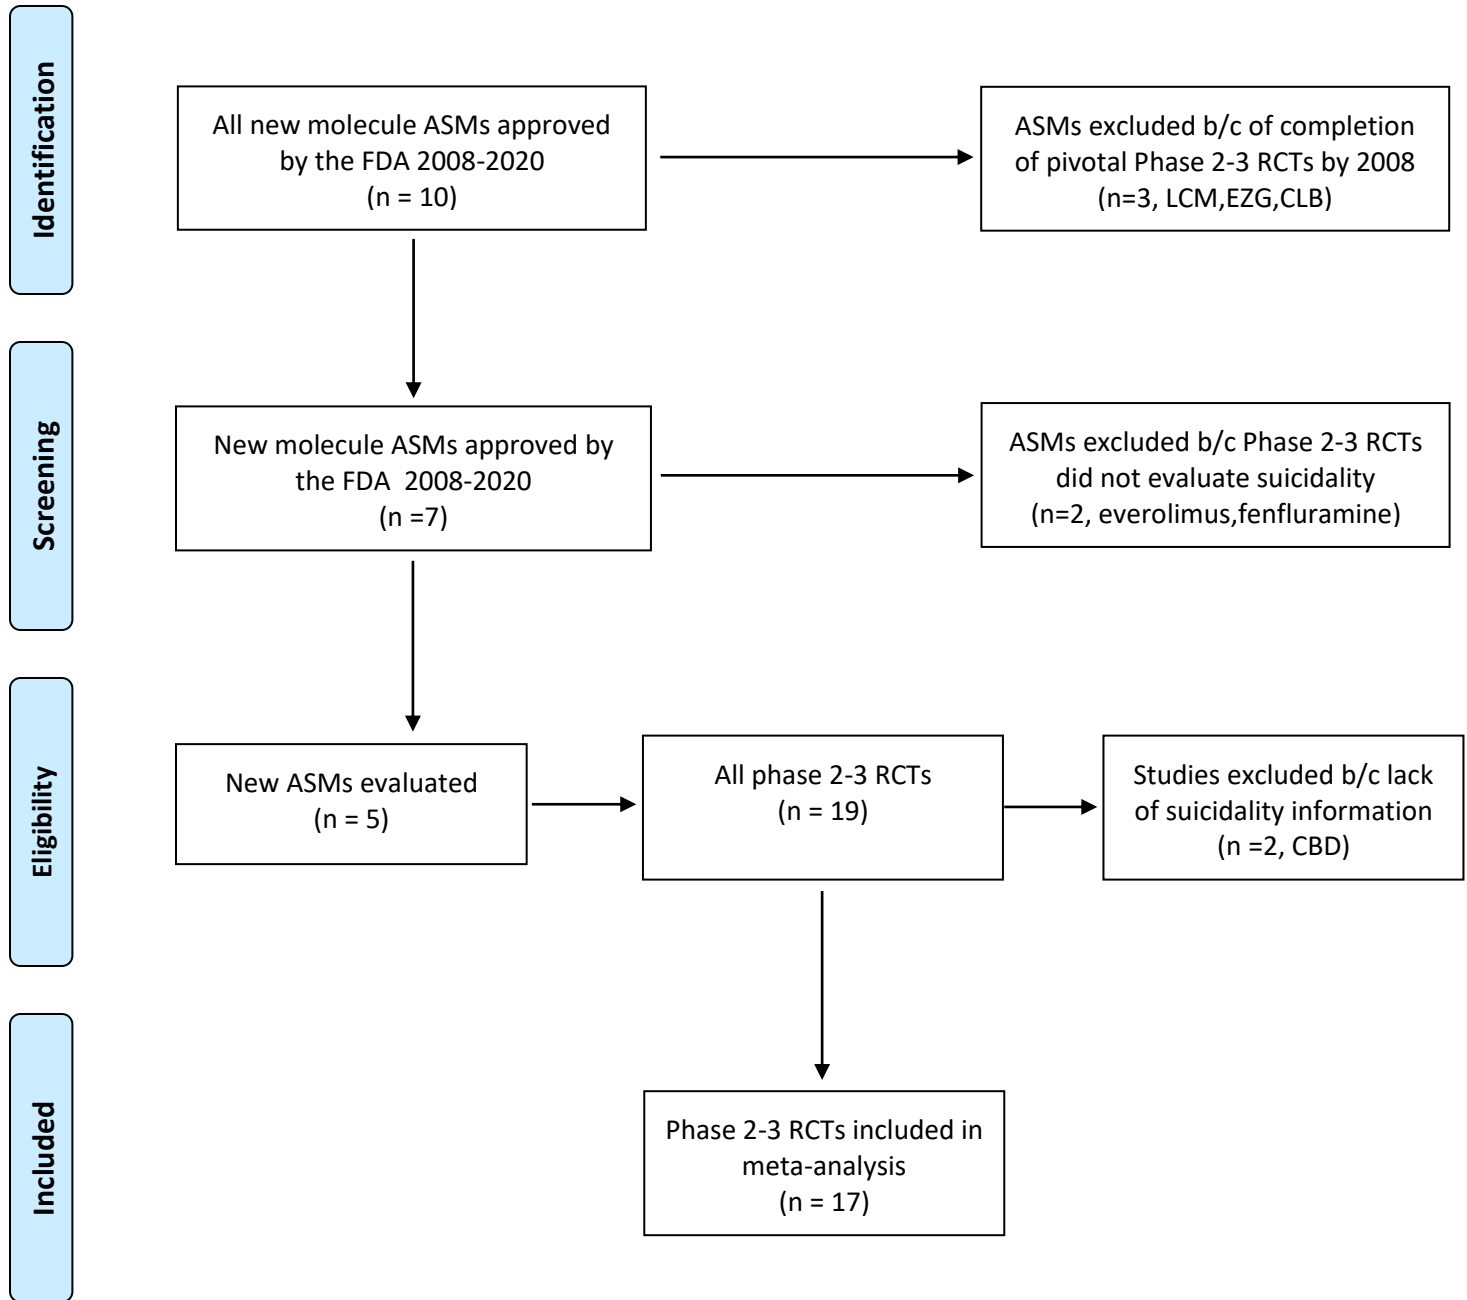

Supplement: jamaneurol-e212480-s001.pdf [file jamaneurol-e212480-s001.pdf]
